# Supplementary material
Source: MDPI journal article supplement (https://www.mdpi.com/2073-4352/8/7/263)
Supplement: s1 [file s1]

## Supporting Information

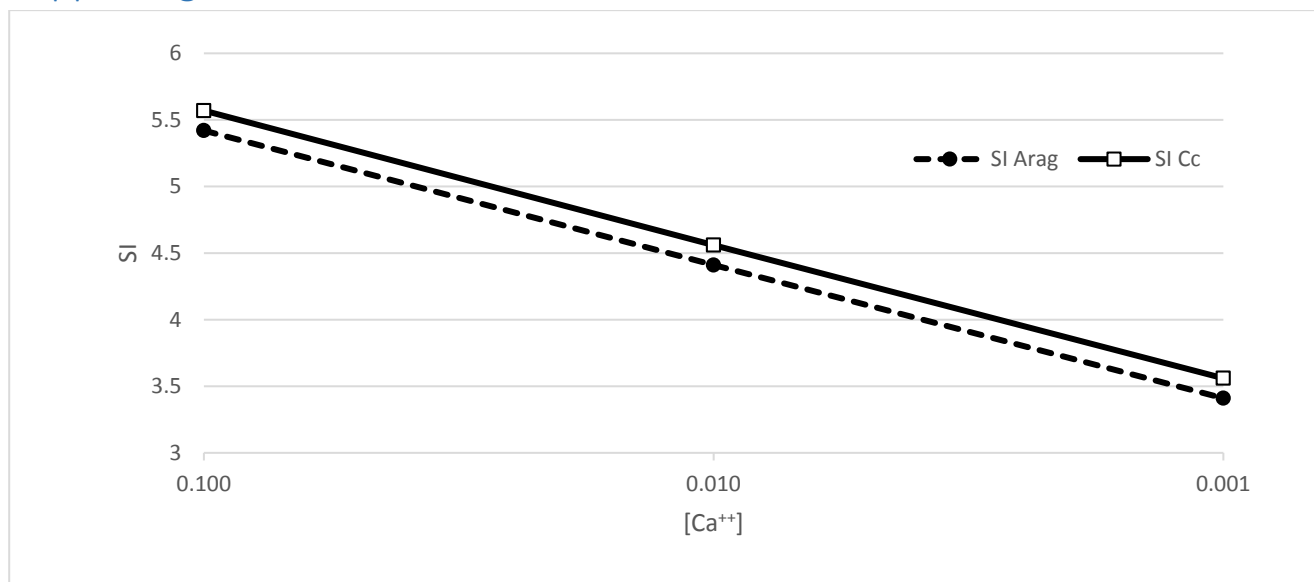

**Figure SI1.** Saturation index (SI) of carbonates in G experiments varying the concentration of calcium chloride

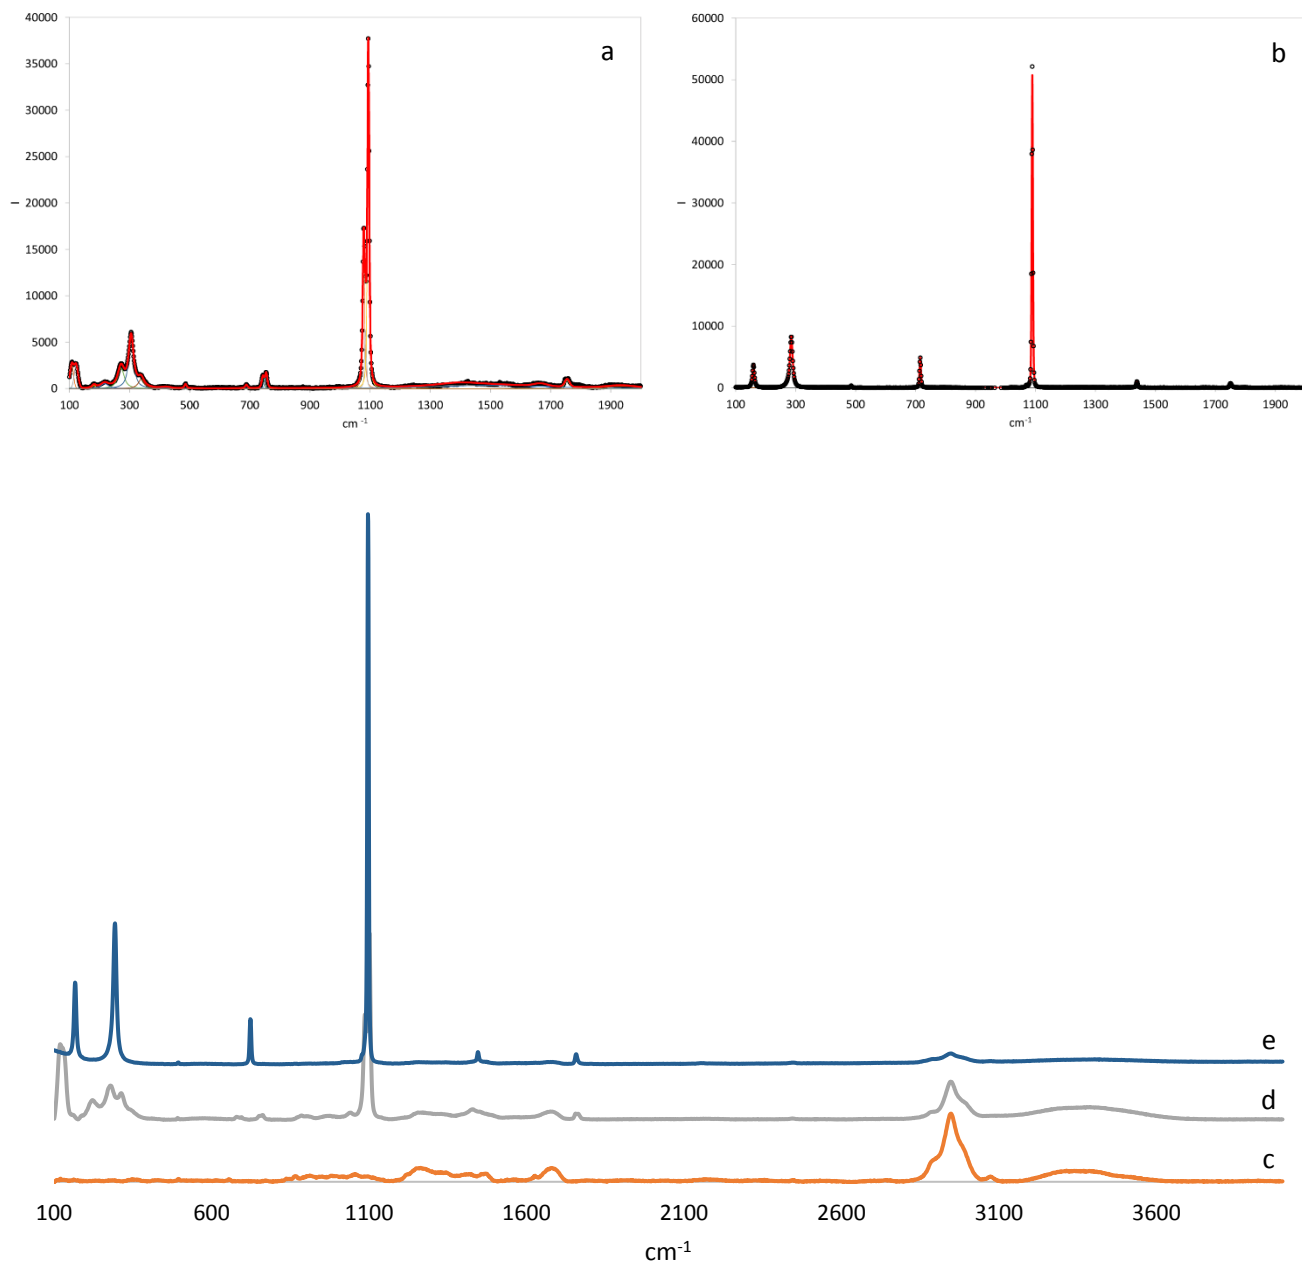

**Figure S12.** a)  $\mu$ -Raman spectrum of the sunflower-like spherulitic aggregate showing the vibrational fingerprint of aragonite; b)  $\mu$ -Raman spectrum of calcite from G experiments; from c to e) comparison among the  $\mu$ -Raman spectra of the pure sericin, the inner and outer part of the spherulite, showing the sericin signal decreasing in intensity from the core toward the outermost part of the spherulite.
